# Supplementary material for: A pilot study of closed-loop neuromodulation for treatment-resistant post-traumatic stress disorder
Source: PubMed Central journal article supplement (PMC10209131; doi:10.1038/s41467-023-38712-1), 2023-05-24
Supplement: 41467_2023_38712_MOESM1_ESM.pdf [file 41467_2023_38712_MOESM1_ESM.pdf]

## Online Materials

### Supplementary Tables and Figures

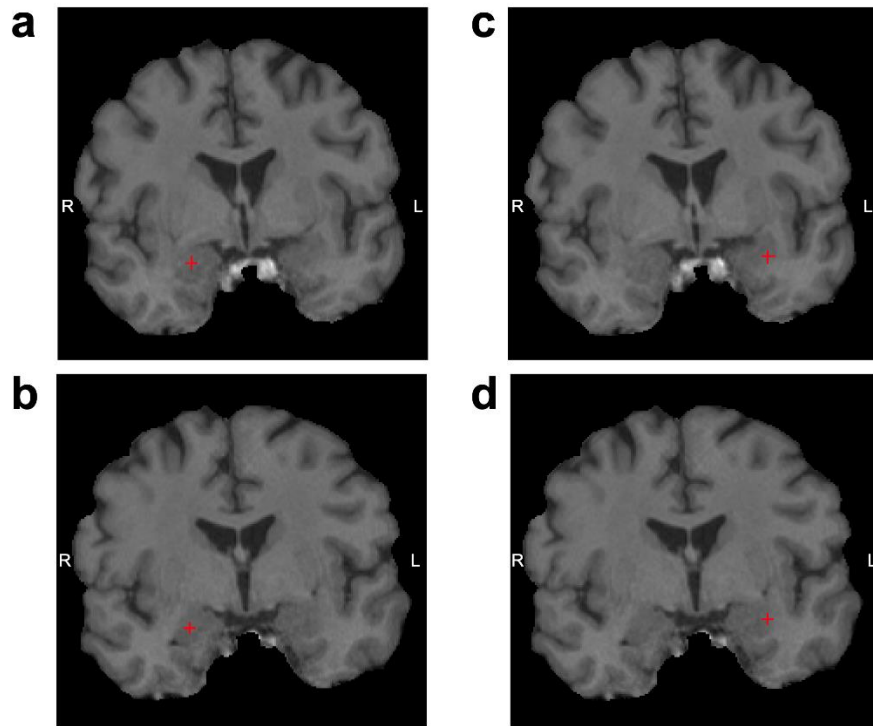

**Supplementary Figure 1. TR-PTSD 1 electrode contact localizations.** RNS contacts localized in the amygdala that comprise right (a-b) and left (c-d) recording channels in TR-PTSD 1 visualized in participant's anatomical MRI space. a and c = anterior contacts; b and d = posterior contacts, R = right, L = left.

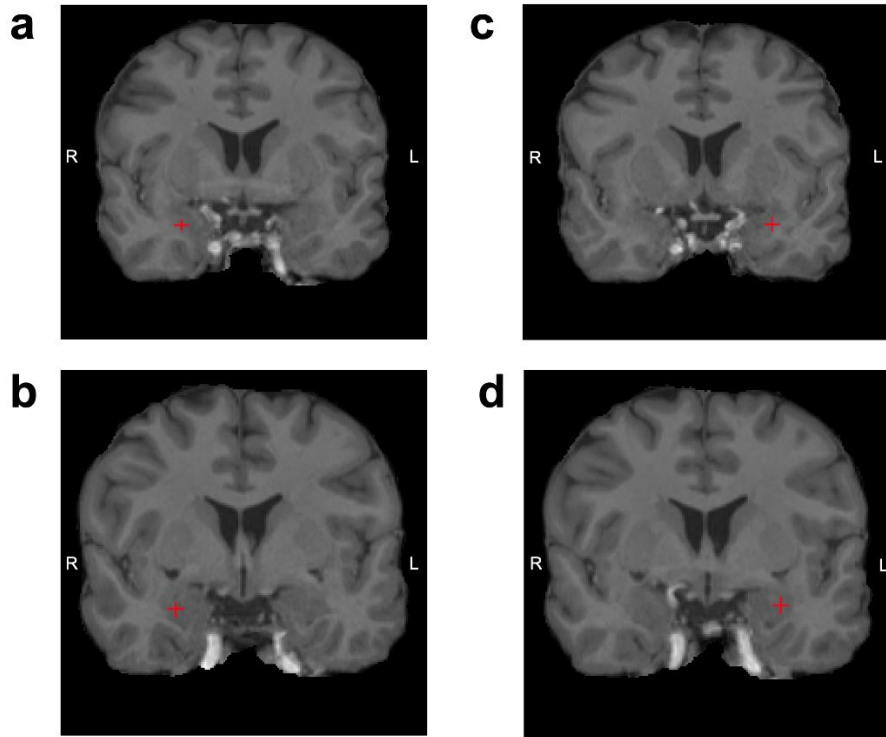

**Supplementary Figure 2. TR-PTSD 2 electrode contact localizations.** RNS contacts localized in the amygdala that comprise right (**a-b**) and left (**c-d**) recording channels in TR-PTSD 2 visualized in participant's anatomical MRI space. **a** and **c** = anterior contacts; **b** and **d** = posterior contacts, R = right, L = left.

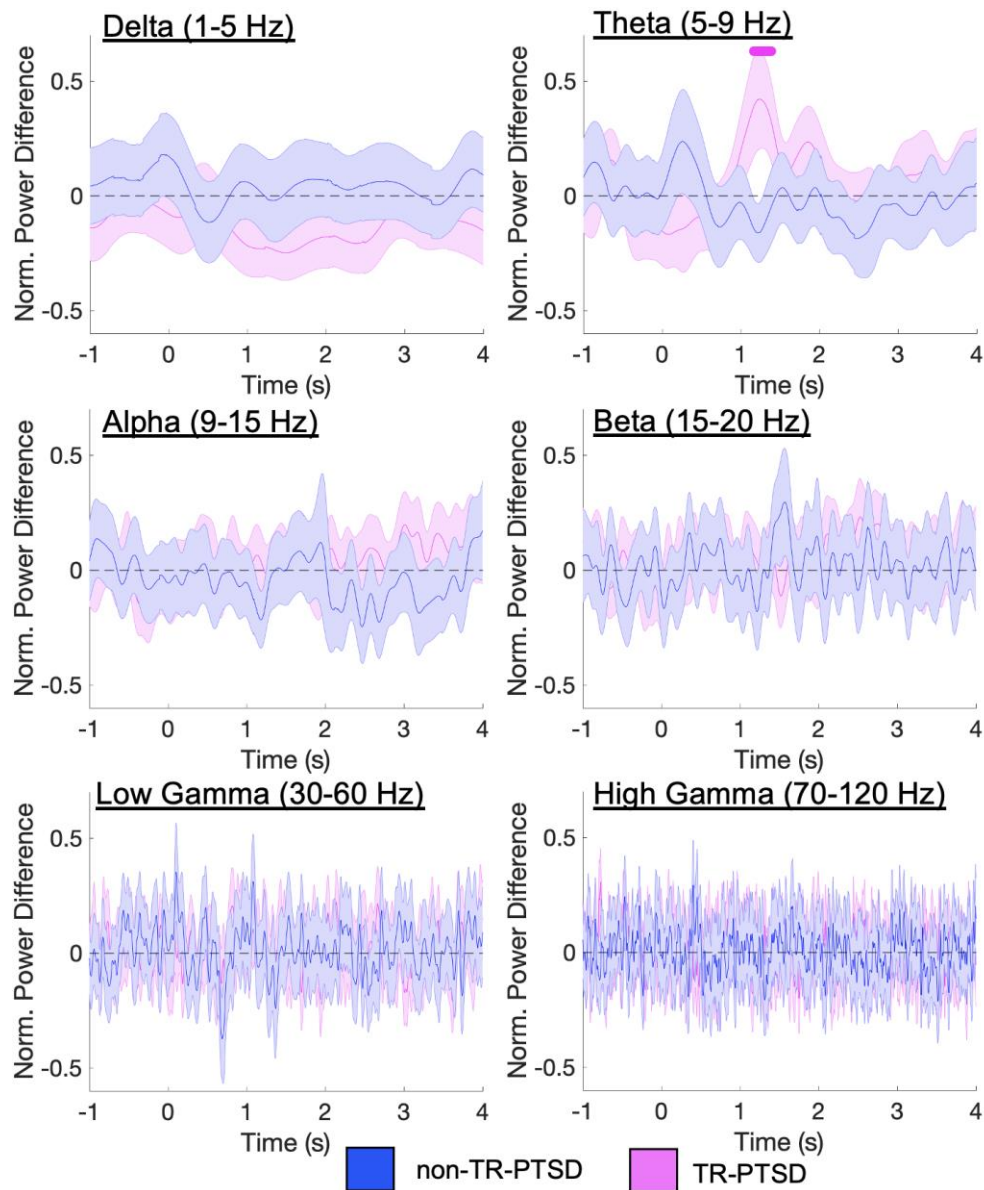

**Supplementary Figure 3. Amygdala valence-related oscillatory changes in TR-PTSD are specific to the theta band.** Normalized (Norm.) difference in frequency bandpower (delta, theta, alpha, beta, low and high gamma) between negative and positive/neutral conditions (negative – positive/neutral) during the Emotional Image Task (related to Fig. 2a) over time separately for TR-PTSD (magenta) and non-TR-PTSD (blue) participants relative to image onset (time 0). Positive norm. power difference = negative > positive/neutral; negative norm. power difference = positive/neutral > negative. For each frequency band, the mean  $\pm$  2 s.e.m. (standard error of the mean) across channels is shown for TR-PTSD ( $N_{\text{participants}} = 2$ ,  $N_{\text{channels}} = 4$ ) and non-TR-PTSD ( $N_{\text{participants}} = 6$ ,  $N_{\text{channels}} = 9$ ) participants. Horizontal bars indicate time points where there were significant differences, which occurred only in theta bandpower (5-9 Hz) between negative and positive trials in TR-PTSD (magenta) but not non-TR-PTSD (blue) participants ( $p < 0.05$ , Bonferroni corrected) using linear mixed effects models (Methods).

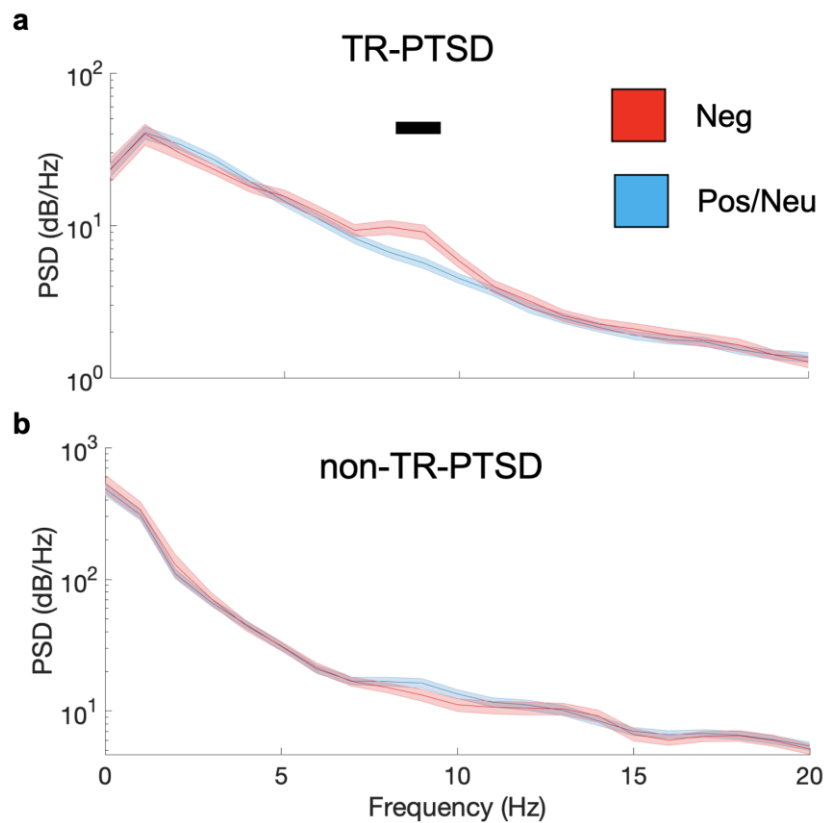

**Supplementary Figure 4. Negative-valence-related amygdala changes only in TR-PTSD participants.** **a**, Mean  $\pm$  s.e.m. power spectral density (PSD, dB/Hz) during negative (red) and positive/neutral images (blue) at specified frequency steps (1–20 Hz) for TR-PTSD participants ( $N_{\text{participants}} = 2$ ,  $N_{\text{channels}} = 4$ ) during the pre-stimulation period. Black bar =  $p < 0.05$ , linear mixed model, Bonferroni corrected. **b**, Mean  $\pm$  s.e.m. PSD in non-TR-PTSD participants ( $N_{\text{participants}} = 6$ ,  $N_{\text{channels}} = 9$ ) during negative (red) and positive/neutral images (blue) at specified frequency steps (1–20 Hz). Significance ( $p < 0.05$ , linear mixed model, Bonferroni corrected) not found.

## At-Home Recordings

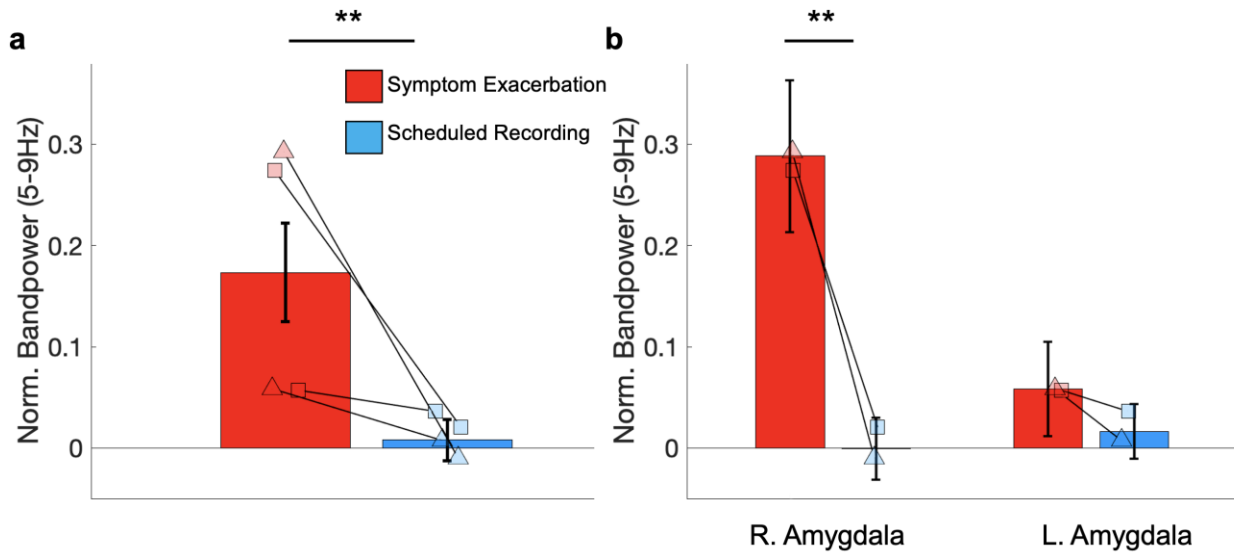

**Supplementary Figure 5. Increased amygdala theta activity during PTSD-related symptomatic episodes.** **a.** Normalized (Norm.) mean  $\pm$  s.e.m. theta (5-9 Hz) bandpower within the amygdala of TR-PTSD participants during symptomatic (red) and asymptomatic (blue) periods (For each bar  $N_{\text{participants}} = 2$ ,  $N_{\text{channels}} = 4$  (left and right amygdala), squares = TR-PTSD 1, triangles = TR-PTSD 2). \*\* = unadjusted  $p = 0.007$  using linear mixed model (Methods). **b.** Same as **a**, but separated by hemisphere (R = Right, L = Left; For each bar  $N_{\text{participants}} = 2$ ,  $N_{\text{channels}} = 2$ , squares = TR-PTSD 1, triangles = TR-PTSD 2). \*\* = unadjusted  $p = 0.002$  using linear mixed model (Methods).

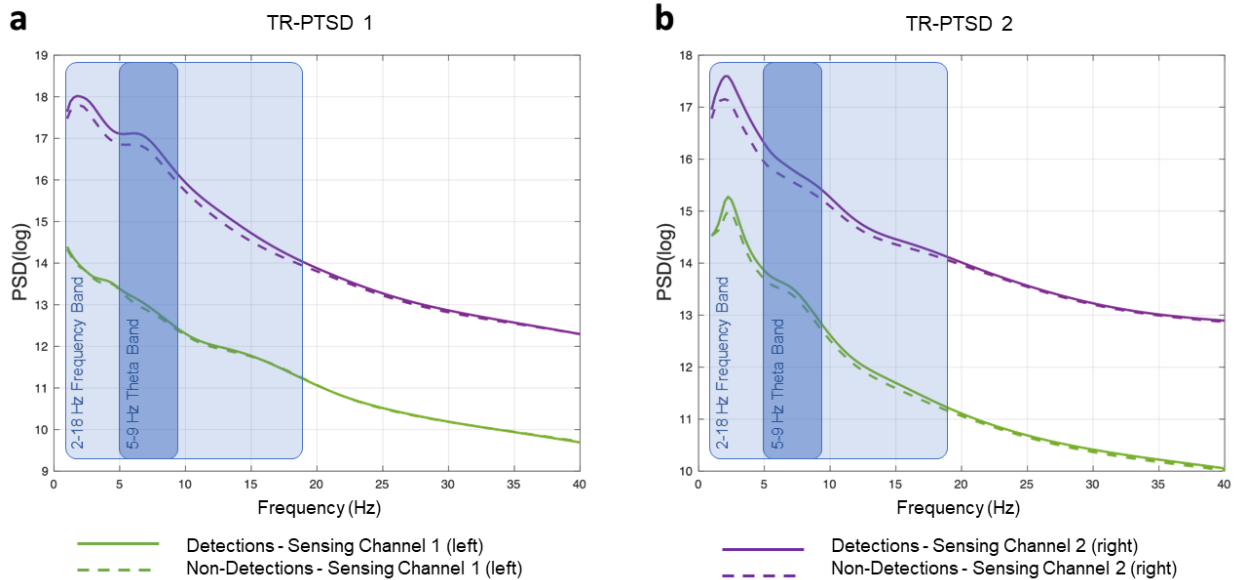

**Supplementary Figure 6. Increased low frequency activity during stimulation-triggering detections.** Power spectral density (PSD) for TR-PTSD 1 (**a**) and TR-PTSD 2 (**b**) during Trigger 1 (Suppl. Table 5) demonstrating elevations in 2-18 Hz bandpower (light blue shaded areas) and 5-9 Hz theta power (dark blue shaded areas) in left (green) and right (purple) sensing channels during detection (solid curve) periods compared to non-detection (dashed curve) periods.

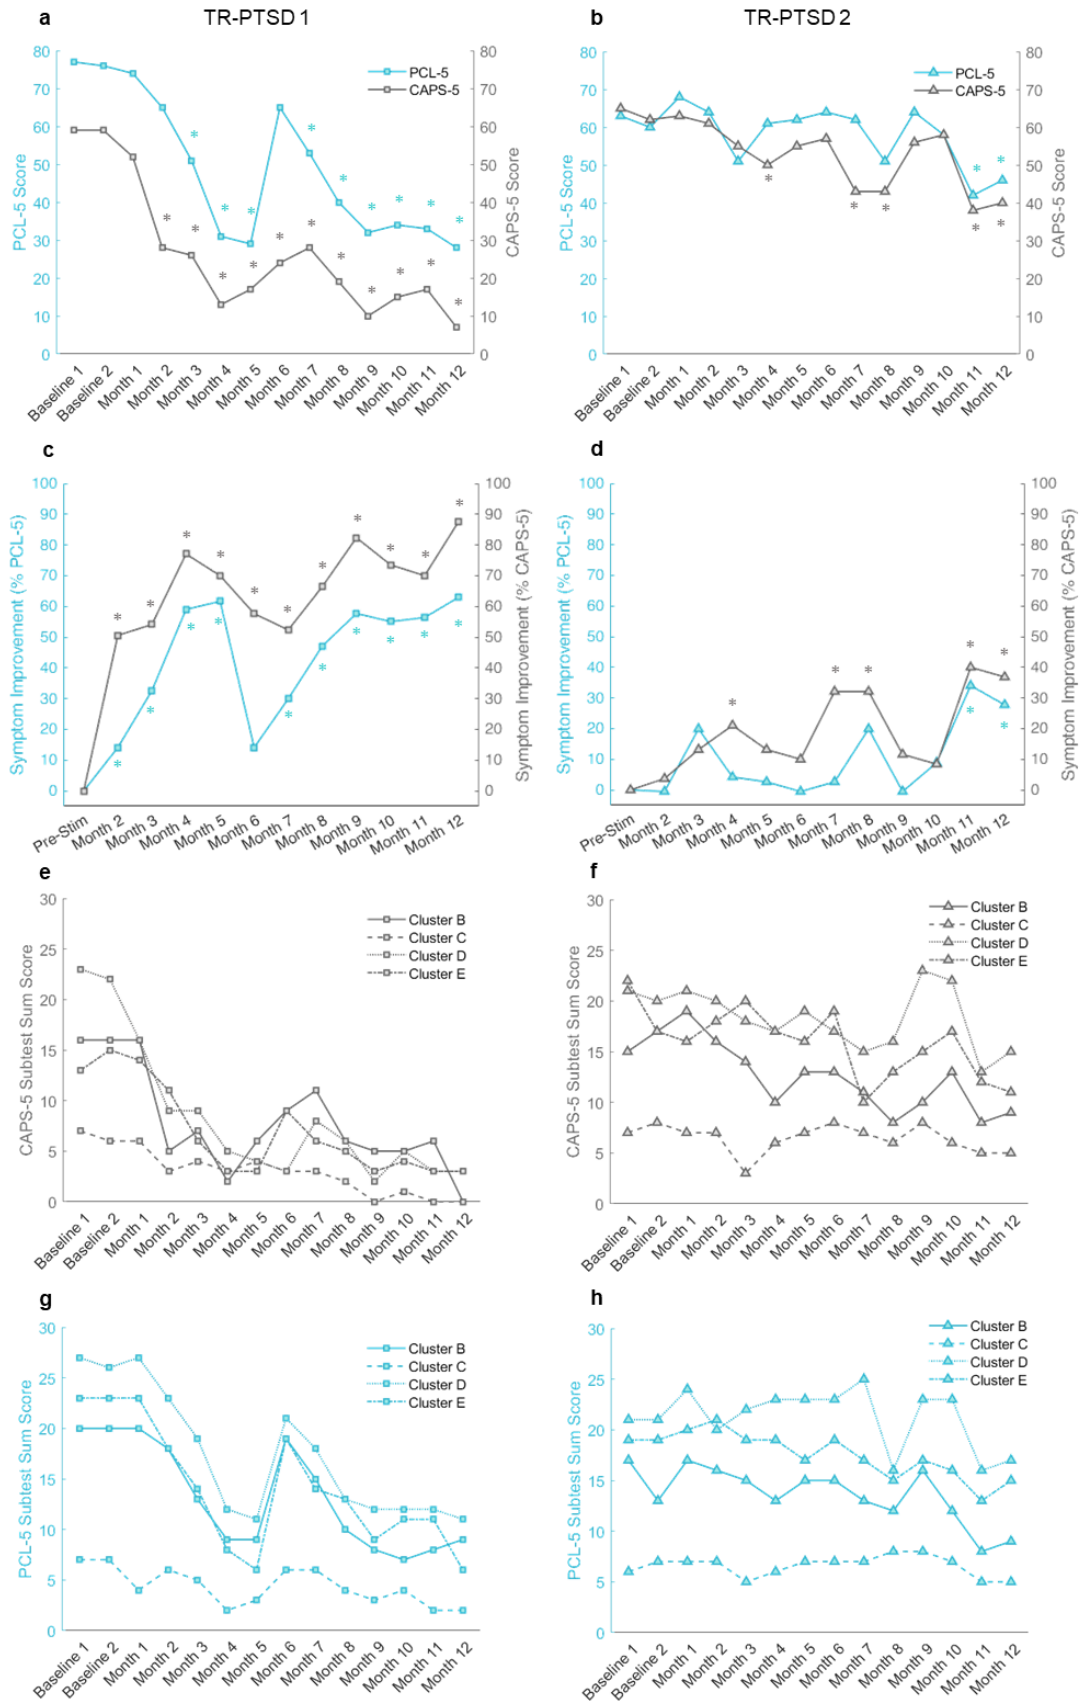

**Supplementary Figure 7. CAPS-5 and PCL-5 subtest scores over time.** Changes in CAPS-5 scores (gray) and PCL-5 scores (cyan) for TR-PTSD 1 (a) and TR-PTSD 2 (b) during Pre-Stim periods (baseline 1, 2, and month 1) and Post-Stim periods (months 2-12). Gray/cyan \* = reliable change in CAPS-5 or PCL-5 scores, respectively, according to threshold for sample 1 reported in Marx et al.<sup>1</sup> relative to pre-stimulation baseline assessments (mean of baseline 1, 2, and month 1). **c-d:** % Symptom improvement on CAPS-5 (gray) and PCL-5 (cyan) during Pre-Stim periods (baseline 1, 2, and month1) and Post-Stim periods (months 2-12). Gray/cyan \* = reliable change in CAPS-5 or PCL-5 scores, respectively, according to threshold for sample 1 reported in Marx et al.<sup>10</sup> relative to pre-stimulation baseline assessments (mean of baseline 1, 2, and month 1). **e-h:** CAPS-5 (gray) and PCL-5 (cyan) subtests including Cluster B (intrusive symptoms), Cluster C (avoidance), Cluster D (negative alterations to mood and cognition), and Cluster E (alterations in arousal and reactivity) over the Pre-Stim and Post-Stim periods for TR-PTSD 1 and TR-PTSD 2.

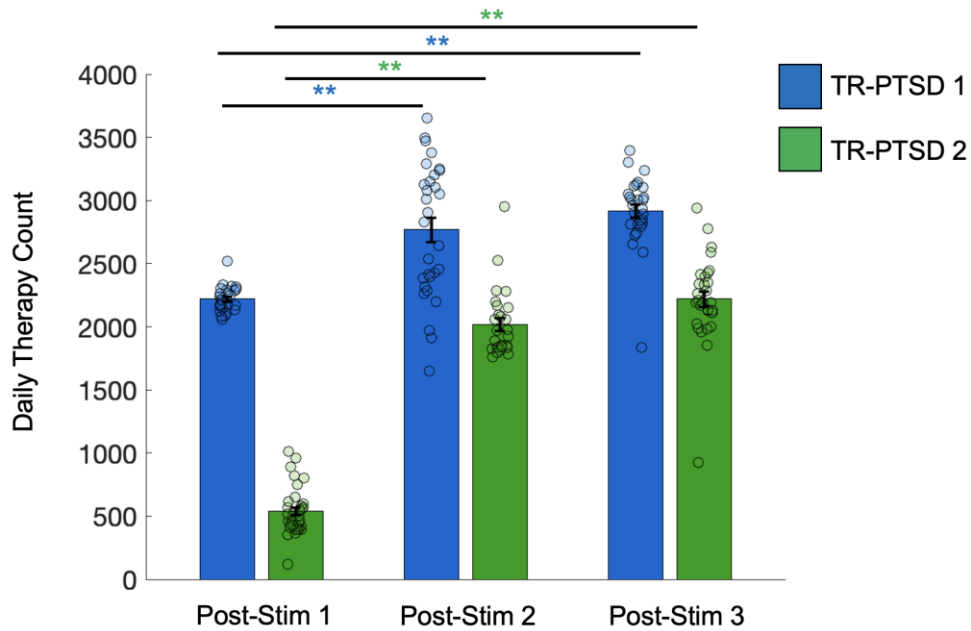

**Supplementary Figure 8. Daily stimulation (therapy) counts in TR-PTSD.** Mean ( $\pm$  s.e.m.) number of daily stimulation therapies delivered prior to Post-Stim 1 (months 2-3), Post-Stim 2 (months 5-6), and Post-Stim 3 (months 10-11) of closed-loop neuromodulation in TR-PTSD 1 (blue) and TR-PTSD 2 (green). TR-PTSD 1: Post-Stim 1  $N_{\text{therapy counts}} = 26$ , Post-Stim 2  $N_{\text{therapy counts}} = 30$ , Post-Stim 3  $N_{\text{therapy counts}} = 28$ ; TR-PTSD 2: Post-Stim 1  $N_{\text{therapy counts}} = 35$ , Post-Stim 2  $N_{\text{therapy counts}} = 27$ , Post-Stim 3  $N_{\text{therapy counts}} = 30$ . \*\* =  $p < 0.001$ , Wilcoxon rank sum test, Bonferroni corrected.

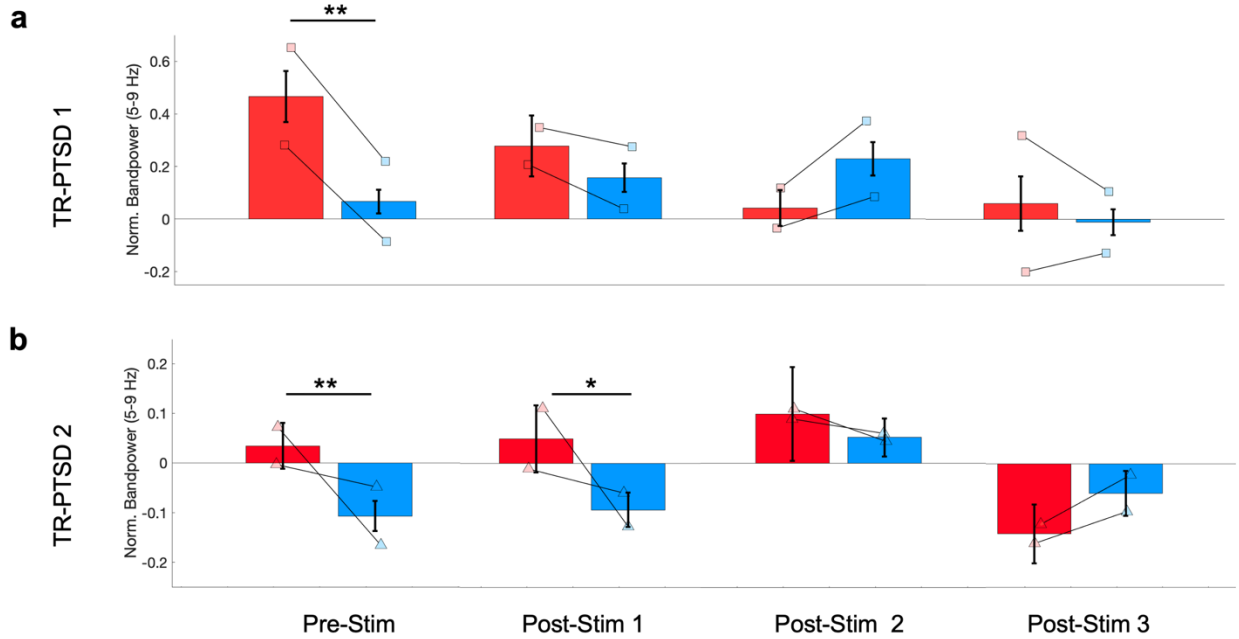

**Supplementary Figure 9. Reduction in negative-image-related amygdala theta following stimulation.** **a**, Normalized (Norm.) mean  $\pm$  s.e.m. amygdala theta bandpower during negative (red) and positive/neutral (blue) images in TR-PTSD 1 (squares) and TR-PTSD 2 (triangles) during Pre-Stim and Post-Stim 1-3 (Fig. 1a) of the Emotional Image Task. For each bar  $N_{\text{participants}} = 1$ ,  $N_{\text{channels}} = 2$  (left and right amygdala). \*\* = unadjusted  $p < 0.001$  using linear mixed model (Methods). **b**, Same as **a**, but for TR-PTSD 2. For each bar  $N_{\text{participants}} = 1$ ,  $N_{\text{channels}} = 2$  (left and right amygdala). Pre-Stim \* = unadjusted  $p = 0.008$ , Post-Stim 1 \* = unadjusted  $p = 0.04$ , using linear mixed model (Methods).

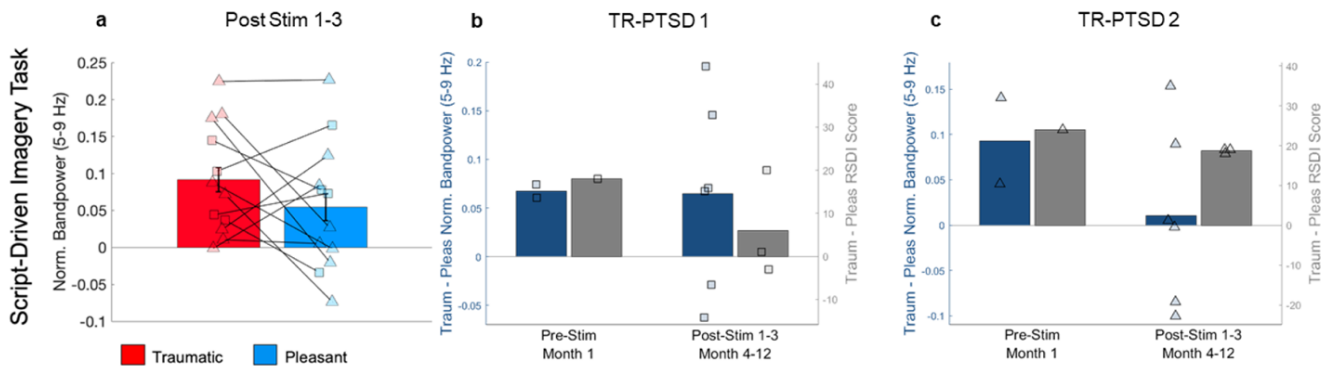

**Supplementary Figure 10. Reduction in trauma-related amygdala theta following stimulation during the Script-Driven Imagery Task over all Post-Stim sessions and in relation to changes in state PTSD symptoms.** **a**, Normalized (Norm.) mean  $\pm$  s.e.m. amygdala theta bandpower during traumatic (red) and pleasant (blue) audio scripts in TR-PTSD 1 (squares) and TR-PTSD 2 (triangles) during Post-Stim 1-3 (Fig. 1a) combined due to limited trials obtained within each session (4 trials per condition). Each bar contains 12 data points ( $N_{\text{participants}} = 2$ ,  $N_{\text{channels}} = 2$  (left and right amygdala),  $N_{\text{sessions}} = 3$ ). **b**, Difference in normalized (Norm.) amygdala theta (5-9 Hz) bandpower between traumatic (Traum) and pleasant (Pleas) audio scripts from the Emotional Image Task (navy) and RSDI scores (gray) for TR-PTSD 1 (squares) during Pre-Stim and Post-Stim 1-3. **c**, Same as **b** but for TR-PTSD 2 (triangles).



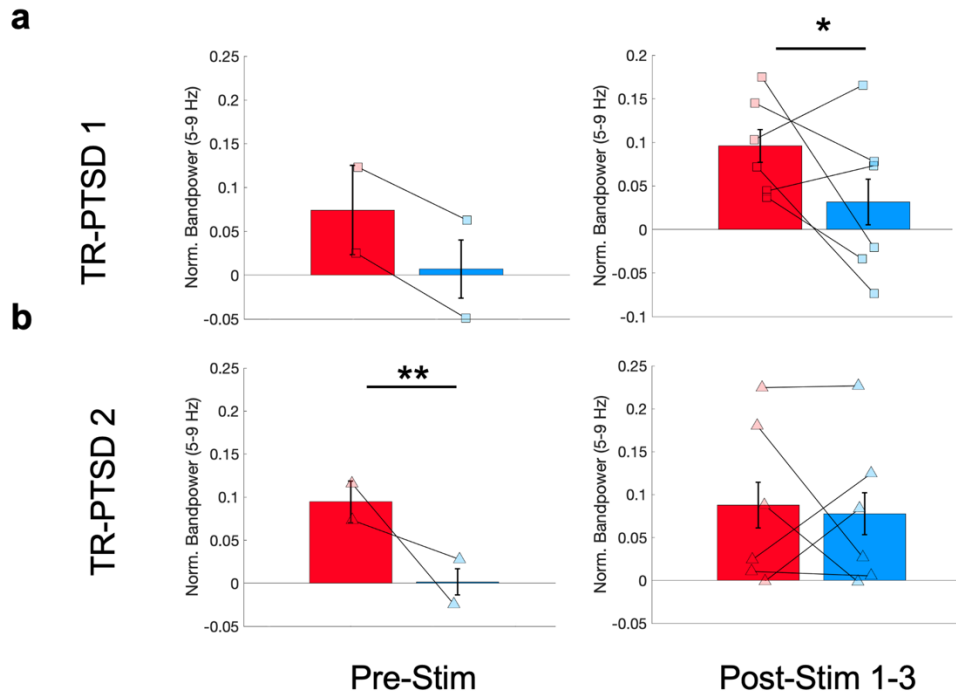

**Supplementary Figure 11. Changes in trauma-related amygdala theta following stimulation.** **a**, Normalized (Norm.) mean  $\pm$  s.e.m. amygdala theta bandpower during traumatic (red) and pleasant (blue) audio scripts in TR-PTSD 1 (squares) during Pre-Stim and Post-Stim sessions 1-3 (Fig. 1a) combined due to limited trials obtained within each session (4 trials per condition). Pre-Stim (Left)  $N_{\text{participants}} = 1$ ,  $N_{\text{channels}} = 2$ ,  $N_{\text{sessions}} = 1$ . Post-Stim 1-3 (Right)  $N_{\text{participants}} = 1$ ,  $N_{\text{channels}} = 2$ ,  $N_{\text{sessions}} = 3$ . \* = unadjusted  $p = 0.04$ , using linear mixed model (Methods). **b**, Same as **a** but in TR-PTSD 2. Pre-Stim (Left)  $N_{\text{participants}} = 1$ ,  $N_{\text{channels}} = 2$ ,  $N_{\text{sessions}} = 1$ . Post-Stim 1-3 (Right)  $N_{\text{participants}} = 1$ ,  $N_{\text{channels}} = 2$ ,  $N_{\text{sessions}} = 3$ . \*\* = unadjusted  $p = 0.0057$ , using linear mixed model (Methods).

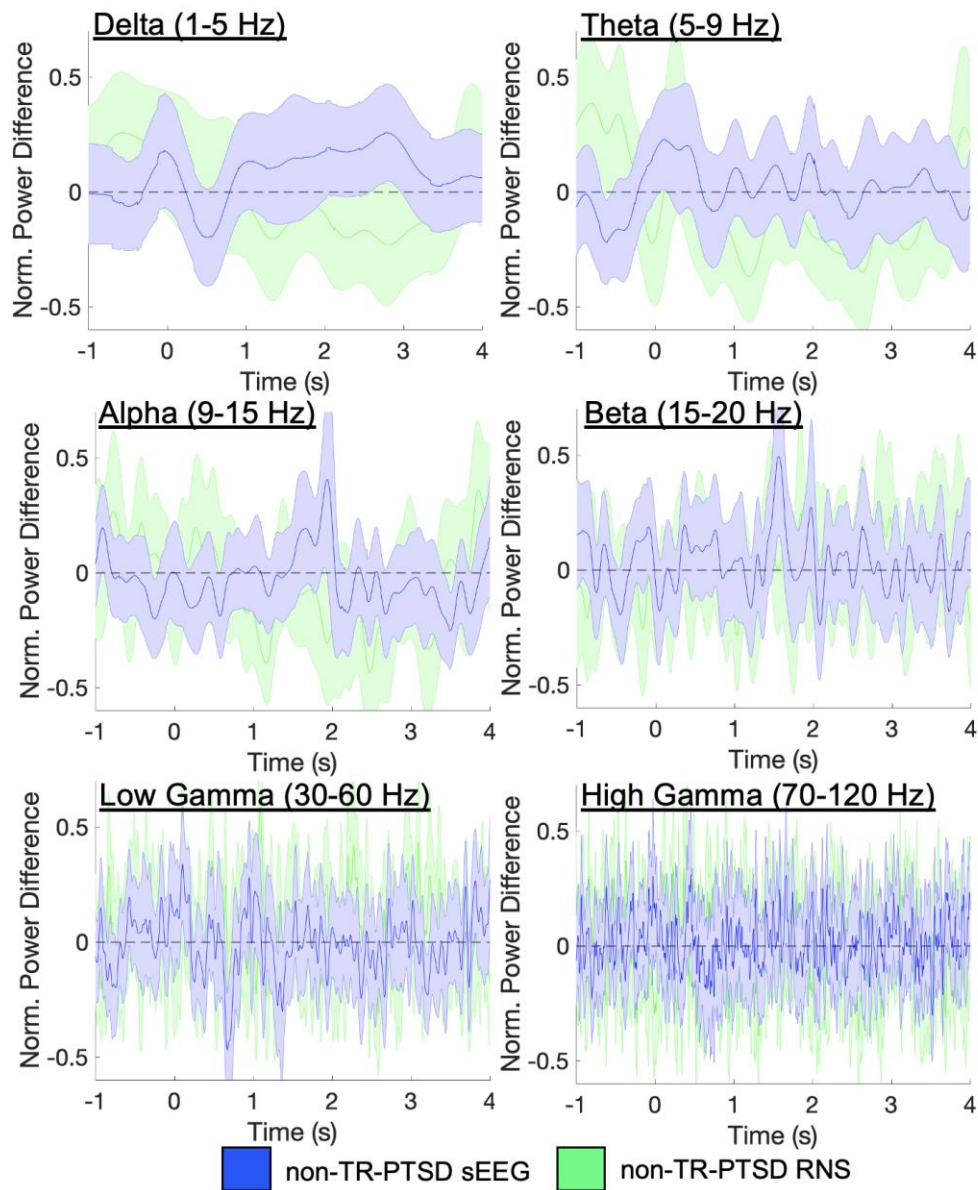

**Supplementary Figure 12. Lack of amygdala valence-related changes in sEEG and RNS non-TR-PTSD participants.**

Normalized (Norm.) difference in frequency bandpower (delta, theta, alpha, beta, low and high gamma) between negative and positive/neutral conditions (negative – positive/neutral) during the Emotional Image Task (related to Fig. 2a) over time separately for sEEG (blue) and RNS (green) non-TR-PTSD participants relative to image onset (time 0). Positive norm. power difference = negative > positive/neutral; negative norm. power difference = positive/neutral > negative. For each frequency band, the mean  $\pm 2$  s.e.m. across channels is shown for non-TR-PTSD sEEG ( $N_{\text{participants}} = 3$ ,  $N_{\text{channels}} = 3$ ) and non-TR-PTSD RNS ( $N_{\text{participants}} = 3$ ,  $N_{\text{channels}} = 6$ ) participants. Significant valence-related changes using linear mixed effects models (see Supplemental Appendix) were not present in non-TR-PTSD, irrespective of recording modality.

| Participant     | Age<br>( $\pm$ s.e.m) | Gender | Handedness   | Implanted System | Clinical Diagnoses that<br>led to Electrode<br>Implantation |
|-----------------|-----------------------|--------|--------------|------------------|-------------------------------------------------------------|
| TR-PTSD 1 and 2 | 38 $\pm$ 2            | M      | Ambidextrous | RNS-320          | TR-PTSD                                                     |
| non-TR-PTSD 1   | 44                    | M      | R            | sEEG             | Epilepsy                                                    |
| non-TR-PTSD 2   | 35                    | M      | L            | sEEG             | Epilepsy                                                    |
| non-TR-PTSD 3   | 40                    | M      | R            | sEEG             | Epilepsy                                                    |
| non-TR-PTSD 4   | 68                    | M      | R            | RNS-320          | Epilepsy                                                    |
| non-TR-PTSD 5   | 28                    | M      | R            | RNS-320          | Epilepsy                                                    |
| non-TR-PTSD 6   | 36                    | M      | R            | RNS-300M         | Epilepsy                                                    |

**Supplementary Table 1.** Participant demographics, implanted electrode systems, and treatment-resistant clinical diagnoses that led to electrode implantation. (sEEG = stereoelectroencephalography, NeuroPace RNS-320 and RNS-300M Systems). TR-PTSD = treatment-resistant post-traumatic stress disorder.

| Participant   | Left Amygdala | Right Amygdala |
|---------------|---------------|----------------|
| non-TR-PTSD 1 | X             | X              |
| non-TR-PTSD 2 |               | X              |
| non-TR-PTSD 3 |               | X              |
| non-TR-PTSD 4 | X             |                |
| non-TR-PTSD 5 |               | X              |
| non-TR-PTSD 6 | X             |                |

**Supplementary Table 2.** Electrode localizations for each epilepsy (non-TR-PTSD) participant showing whether each had a left and/or right amygdala channel that was included in the study.

| Participant    | Right<br>Amygdala<br>C1 (x,y,z) | Right<br>Amygdala<br>C2 (x,y,z) | Left<br>Amygdala<br>C1 (x,y,z) | Left<br>Amygdala<br>C2 (x,y,z) |
|----------------|---------------------------------|---------------------------------|--------------------------------|--------------------------------|
| TR-PTSD 1      | (35,64,26)                      | (35,61,26)                      | (60,64,26)                     | (60,62,28)                     |
| TR-PTSD 2      | (34,64,27)                      | (34,62,28)                      | (59,65,28)                     | (59,62,29)                     |
| non-TR-PTSD 1* | (37,62,25)<br>(32,62,25)        | (35,62,25)<br>(30,62,25)        | (55,63,25)<br>(59,63,25)       | (57,63,25)<br>(62,63,25)       |
| non-TR-PTSD 2  | (34,62,27)                      | (31,62,27)                      |                                |                                |
| non-TR-PTSD 3  | (29,62,29)                      | (29,62,29)                      |                                |                                |
| non-TR-PTSD 4  |                                 |                                 | (56,63,30)                     | (57,61,30)                     |
| non-TR-PTSD 5  | (32,65,23)                      | (32,61,25)                      |                                |                                |
| non-TR-PTSD 6  |                                 |                                 | (58,62,26)                     | (58,66,24)                     |

**Supplementary Table 3.** Electrode localizations showing specific MNI coordinates (x,y,z) of both contacts (C1 and 2) of the left and right amygdala bipolar channels in each TR-PTSD participant that were used for iEEG recording and closed-loop stimulation. \*Non-TR-PTSD 1 had two bipolar channels located within the amygdala bilaterally. MNI152\_T1\_2mm was used to register all images.

| Participant | Event | Symptom Description                                                                | SUDS Score   |
|-------------|-------|------------------------------------------------------------------------------------|--------------|
| TR-PTSD 1   | 1°    | “Fireworks around neighborhood. Hypervigilant racy feeling.”                       | 8            |
| TR-PTSD 1   | 2°    | “Saw a very gory scene flash in my mind, weak knees, cold sweat, shaking, vision.” | Not reported |
| TR-PTSD 2   | 1°    | “Sad, depressed”                                                                   | 5            |
| TR-PTSD 2   | 2°    | “Angry, irritable, somewhat suicidal thoughts”                                     | 4-5          |

**Supplementary Table 4.** Examples of self-reported descriptions related to self-triggered recordings of symptom exacerbations (magnet swipe recordings) for TR-PTSD 1 and TR-PTSD 2. °These events triggered intrusive recollections of combat trauma. SUDS = Subjective Units of Distress Scale

| Participant            | Stimulation Logic                             | Proportion of Detection         |
|------------------------|-----------------------------------------------|---------------------------------|
| TR-PTSD 1 (Month 1-12) | Trigger 1 or Trigger 2<br>(either hemisphere) | 96% (Trigger 1) 4% (Trigger 2)  |
| TR-PTSD 2 (Month 1-2)  | Trigger 1 or Trigger 2<br>(both hemispheres)  | 51% (Trigger 1) 49% (Trigger 2) |
| TR-PTSD 2 (Month 3-12) | Trigger 1 or Trigger 2<br>(either hemisphere) | 85% (Trigger 1) 15% (Trigger 2) |

**Supplementary Table 5. RNS programming logic used in closed-loop stimulation.** Trigger 1: Greater than 50% change in area under the curve for low frequencies (2-18 Hz) for longer than 0.26 seconds in either posterior amygdala channel. Trigger 2: Greater than 62.5% change in average line length in either left or right posterior amygdala channel. In all cases, activation of stimulation trigger led to delivery of 100 ms of 1.0-3.0 mA current (charge-balanced biphasic square wave pulses) at 200 Hz with a pulse width of 160 microseconds delivered bilaterally, simultaneously to amygdala contacts (estimated charge density: 1.0  $\mu\text{C}/\text{cm}^2$ ). Daily therapy limit: 5000 stimulations.

| <b>Negative</b>     | <b>Valence</b> | <b>Arousal</b> | <b>Dominance</b> |
|---------------------|----------------|----------------|------------------|
| TR-PTSD pre-stim    | 2.33 (0.08)    | 5.89 (0.11)    | 3.62 (0.10)      |
| TR-PTSD post-stim 1 | 2.43 (0.90)    | 5.51 (0.18)    | 3.83 (0.18)      |
| TR-PTSD post-stim 2 | 2.37 (0.10)    | 5.56 (0.21)    | 3.66 (0.15)      |
| TR-PTSD post-stim 3 | 2.39 (.13)     | 5.42 (0.26)    | 3.90 (0.22)      |
| non-TR-PTSD         | 2.39 (0.13)    | 5.62 (0.28)    | 3.86 (0.17)      |
| <b>Positive</b>     | <b>Valence</b> | <b>Arousal</b> | <b>Dominance</b> |
| TR-PTSD pre-stim    | 7.70 (0.05)    | 5.47 (0.13)    | 6.23 (0.07)      |
| TR-PTSD post-stim 1 | 7.58 (0.09)    | 5.07 (0.21)    | 6.18 (0.13)      |
| TR-PTSD post-stim 2 | 7.56 (0.08)    | 5.12 (0.25)    | 6.12 (0.15)      |
| TR-PTSD post-stim 3 | 7.55 (0.13)    | 4.97 (0.33)    | 6.20 (0.19)      |
| non-TR-PTSD         | 7.73 (0.08)    | 5.13 (0.21)    | 6.29 (0.10)      |
| <b>Neutral</b>      | <b>Valence</b> | <b>Arousal</b> | <b>Dominance</b> |
| TR-PTSD pre-stim    | 4.97 (0.07)    | 3.48 (0.17)    | 5.67 (0.09)      |
| TR-PTSD post-stim 1 | 5.12 (0.14)    | 3.56 (0.16)    | 5.80 (0.13)      |
| TR-PTSD post-stim 2 | 5.11 (0.12)    | 3.55 (0.20)    | 5.82 (0.12)      |
| TR-PTSD post-stim 3 | 5.10 (0.21)    | 3.70 (0.21)    | 5.73 (0.23)      |
| non-TR-PTSD         | 5.79 (0.22)    | 3.90 (0.25)    | 5.92 (0.12)      |

**Supplementary Table 6.** Mean (s.e.m.) valence, arousal and dominance for IAPS emotional image sets used in the study for treatment-resistant post-traumatic stress disorder (TR-PTSD) and non-TR-PTSD (epilepsy) participants calculated from normalized ratings<sup>2</sup>. For TR-PTSD participants, ratings are separated for pre- (Pre-Stim) and post-stimulation (Post-Stim) sessions 1 and 2.

| <b>Negative</b>     | <b>Brightness</b> | <b>Contrast</b> | <b>Entropy</b> |
|---------------------|-------------------|-----------------|----------------|
| TR-PTSD Pre-Stim    | 106.27 (6.27)     | 67.39 (2.14)    | 7.06 (0.18)    |
| TR-PTSD Post-Stim 1 | 100.57 (7.14)     | 68.96 (3.00)    | 7.15 (0.22)    |
| TR-PTSD Post-Stim 2 | 102.86 (7.92)     | 65.96 (3.24)    | 7.09 (0.23)    |
| TR-PTSD Post-Stim 3 | 99.01 (8.49)      | 71.61 (3.78)    | 6.94 (0.25)    |
| non-TR-PTSD         | 110.98 (8.45)     | 66.30 (3.65)    | 7.40 (0.10)    |
| <b>Positive</b>     | <b>Brightness</b> | <b>Contrast</b> | <b>Entropy</b> |
| TR-PTSD Pre-Stim    | 104.74 (7.22)     | 70.49 (2.74)    | 6.97 (0.19)    |
| TR-PTSD Post-Stim 1 | 122.43 (8.27)     | 71.45 (3.49)    | 6.89 (0.22)    |
| TR-PTSD Post-Stim 2 | 108.74 (7.93)     | 72.10 (2.68)    | 7.04 (0.19)    |
| TR-PTSD Post-Stim 3 | 100.32 (7.03)     | 70.23 (2.72)    | 7.09 (0.21)    |
| non-TR-PTSD         | 100.45 (5.98)     | 70.36 (2.64)    | 7.13 (0.17)    |
| <b>Neutral</b>      | <b>Brightness</b> | <b>Contrast</b> | <b>Entropy</b> |
| TR-PTSD Pre-Stim    | 116.89 (8.88)     | 64.16 (3.68)    | 6.95 (0.12)    |
| TR-PTSD Post-Stim 1 | 108.81 (9.49)     | 63.14 (3.19)    | 6.89 (0.22)    |
| TR-PTSD Post-Stim 2 | 102.8 (9.72)      | 66.05 (3.59)    | 7.04 (0.22)    |
| TR-PTSD Post-Stim 3 | 101.15 (10.89)    | 60.04 (2.73)    | 6.69 (0.28)    |
| non-TR-PTSD         | 95.45 (7.69)      | 60.65 (4.19)    | 7.05 (0.26)    |

**Supplementary Table 7. Psychophysical properties of emotional images.** Mean (s.e.m.) brightness, contrast and entropy for IAPS emotional image sets used in the study. Parameters calculated using previously described methods<sup>3</sup>. For TR-PTSD participants, ratings are separated for pre- (Pre-Stim) and post-stimulation (Post-Stim) 1 and 2 sessions.

## Supplementary References

1. Marx, B. P. *et al.* Reliable and clinically significant change in the clinician-administered PTSD Scale for DSM-5 and PTSD Checklist for DSM-5 among male veterans. *Psychological Assessment* **34**, 197–203 (2022).
2. Lang, P. J., Bradley, M. M. & Cuthbert, B. N. International affective picture system (IAPS): Instruction manual and affective ratings, Technical Report A-8. *Gainesville: The center for research in psychophysiology, University of Florida* (2008).
3. Marchewka, A., Zurawski, Ł., Jednoróg, K. & Grabowska, A. The Nencki Affective Picture System (NAPS): introduction to a novel, standardized, wide-range, high-quality, realistic picture database. *Behav Res Methods* **46**, 596–610 (2014).
