# Supplementary material for: A pilot study of closed-loop neuromodulation for treatment-resistant post-traumatic stress disorder
Source: PubMed Central journal article supplement (PMC10209131; doi:10.1038/s41467-023-38712-1), 2023-05-24
Supplement: 41467_2023_38712_MOESM5_ESM.pdf [file 41467_2023_38712_MOESM5_ESM.pdf]

## Reporting Summary

Nature Portfolio wishes to improve the reproducibility of the work that we publish. This form provides structure for consistency and transparency in reporting. For further information on Nature Portfolio policies, see our [Editorial Policies](#) and the [Editorial Policy Checklist](#).

### Statistics

For all statistical analyses, confirm that the following items are present in the figure legend, table legend, main text, or Methods section.

- | n/a                                 | Confirmed                                                                                                                                                                                                                                                                                      |
|-------------------------------------|------------------------------------------------------------------------------------------------------------------------------------------------------------------------------------------------------------------------------------------------------------------------------------------------|
| <input type="checkbox"/>            | <input checked="" type="checkbox"/> The exact sample size ( $n$ ) for each experimental group/condition, given as a discrete number and unit of measurement                                                                                                                                    |
| <input type="checkbox"/>            | <input checked="" type="checkbox"/> A statement on whether measurements were taken from distinct samples or whether the same sample was measured repeatedly                                                                                                                                    |
| <input type="checkbox"/>            | <input checked="" type="checkbox"/> The statistical test(s) used AND whether they are one- or two-sided<br><i>Only common tests should be described solely by name; describe more complex techniques in the Methods section.</i>                                                               |
| <input type="checkbox"/>            | <input checked="" type="checkbox"/> A description of all covariates tested                                                                                                                                                                                                                     |
| <input type="checkbox"/>            | <input checked="" type="checkbox"/> A description of any assumptions or corrections, such as tests of normality and adjustment for multiple comparisons                                                                                                                                        |
| <input type="checkbox"/>            | <input checked="" type="checkbox"/> A full description of the statistical parameters including central tendency (e.g. means) or other basic estimates (e.g. regression coefficient) AND variation (e.g. standard deviation) or associated estimates of uncertainty (e.g. confidence intervals) |
| <input type="checkbox"/>            | <input checked="" type="checkbox"/> For null hypothesis testing, the test statistic (e.g. $F$ , $t$ , $r$ ) with confidence intervals, effect sizes, degrees of freedom and $P$ value noted<br><i>Give <math>P</math> values as exact values whenever suitable.</i>                            |
| <input checked="" type="checkbox"/> | <input type="checkbox"/> For Bayesian analysis, information on the choice of priors and Markov chain Monte Carlo settings                                                                                                                                                                      |
| <input checked="" type="checkbox"/> | <input type="checkbox"/> For hierarchical and complex designs, identification of the appropriate level for tests and full reporting of outcomes                                                                                                                                                |
| <input type="checkbox"/>            | <input checked="" type="checkbox"/> Estimates of effect sizes (e.g. Cohen's $d$ , Pearson's $r$ ), indicating how they were calculated                                                                                                                                                         |

*Our web collection on [statistics for biologists](#) contains articles on many of the points above.*

### Software and code

Policy information about [availability of computer code](#)

Data collection

Data analysis

For manuscripts utilizing custom algorithms or software that are central to the research but not yet described in published literature, software must be made available to editors and reviewers. We strongly encourage code deposition in a community repository (e.g. GitHub). See the Nature Portfolio [guidelines for submitting code & software](#) for further information.

### Data

Policy information about [availability of data](#)

All manuscripts must include a [data availability statement](#). This statement should provide the following information, where applicable:

- Accession codes, unique identifiers, or web links for publicly available datasets
- A description of any restrictions on data availability
- For clinical datasets or third party data, please ensure that the statement adheres to our [policy](#)

## Human research participants

Policy information about [studies involving human research participants and Sex and Gender in Research.](#)

### Reporting on sex and gender

The sex of all participants is reported. Sex was not factored into study design. Sex based analyses were not performed as all study participants were male.

### Population characteristics

A total of 8 participants (all male, ages 28-68) with depth electrodes that were previously implanted for either treatment-resistant PTSD (TR-PTSD; N=2) or epilepsy (non-TR-PTSD, N=6) completed the study (Supplementary Table 1). More details can be found in Supplementary Tables 2 and 3 of the manuscript.

### Recruitment

Treatment-resistant post traumatic stress disorder (TR-PTSD) participants were recruited from the Veteran Affairs Healthcare System (VAHS) and the Ronald Regan Medical UCLA Center (RRUMC). Referrals and recruitment were generated from chart review, treating psychiatrists, and other providers. All participants provided written, informed consent according to a protocol approved by the UCLA and VAHS Medical Institutional Review Boards (IRB). The supporting grant (UH3NS107673) limited recruitment to male participants, limiting generalization of finding to other sexes. Our sample is also biased towards combat veterans given the use of VAHS as the major recruitment site, potentially limiting findings to a specific subgroup of the PTSD population.

Non-TR-PTSD participants were referred by treating physicians at UCLA and VAHS following expression of interest in research participation.

### Ethics oversight

All participants volunteered for the study by providing informed consent according to a protocol approved by the UCLA and VAHS Medical Institutional Review Boards.

Note that full information on the approval of the study protocol must also be provided in the manuscript.

## Field-specific reporting

Please select the one below that is the best fit for your research. If you are not sure, read the appropriate sections before making your selection.

Life sciences  Behavioural & social sciences  Ecological, evolutionary & environmental sciences

For a reference copy of the document with all sections, see [nature.com/documents/nr-reporting-summary-flat.pdf](https://nature.com/documents/nr-reporting-summary-flat.pdf)

## Life sciences study design

All studies must disclose on these points even when the disclosure is negative.

### Sample size

A total of 8 participants (all male, ages 28-68) with depth electrodes that were previously implanted for either treatment-resistant PTSD (TR-PTSD; N=2) or epilepsy (non-TR-PTSD, N=6) completed the study. TR-PTSD participants were diagnosed with severe, chronic combat PTSD (CAPS-5 score > 47 across > 8 weeks, total illness duration ≥ 5 years with no period of clinical remission), and clinically significant impairment in social and occupational functioning due to PTSD (≥ 70% service-connected disability, Global Assessment of Functioning Score (GAF)16 ≤ 45, or no period of full-time employment for longer than 3 months in the past 5 years). Their PTSD symptoms corresponded to stage 2 of treatment-resistance for PTSD.<sup>17</sup> Clinical record documented failure to respond to adequate (minimum 3 month, with adherence) trials of at least 3 evidence-based treatments including at least one pharmacologic agent (sertraline, paroxetine, fluoxetine or venlafaxine), and at least one trauma-focused individual cognitive-behavioral psychotherapy (either Prolonged Exposure Therapy [PE], Cognitive Processing Therapy [CPT], Eye movement Desensitization and Reprocessing [EMDR], or other form of evidence-based cognitive behavioral therapy for PTSD). TR-PTSD participants were chronically implanted with the RNS system (NeuroPace, Inc., Mountain View, CA) as part of a clinical trial (ClinicalTrials.gov [NCT04152993]), whereas epilepsy participants were implanted during clinical care, three with acute stereoelectroencephalography (sEEG) electrodes for evaluation of pharmaco-resistant epilepsy and three with a chronically implanted RNS System (NeuroPace, Inc., Mountain View). Given the rare opportunity to test with such patients, the sample size was informed by availability for and interest in study participation. Though limited, we believe that this initial pilot investigation provides reasonable support for discussed findings.

### Data exclusions

Across non-TR-PTSD participants electrodes were in a variety of structures including the amygdala, hippocampus, prefrontal cortex, and cingulate cortex. Only electrodes located within the amygdala (n=10) contributed to non-TR-PTSD analyses to match analyses completed in TR-PTSD participants in whom four channels were in the amygdala.

### Replication

The emotional image task was performed eight times independently with eight different participants. The task was repeated three times at three separate time points (Post-Stim 1-3) in TR-PTSD. The script driven imagery task was repeated three times (Post-Stim 1-3) in two different TR-PTSD participants. As described in the study, response to task stimuli are related to clinical response to closed loop therapy.

Separate investigations in TR-PTSD participants will be necessary to replicate results All methods used to perform this study and analyses needed to replicate the presented findings are detailed in the Methods section of the manuscript. Data were statistically analyzed on the group-level (i.e., non-TR-PTSD and TR-PTSD). Though further investigations are necessary to characterize differences between TR-PTSD and non-TR-PTSD neural dynamics related to emotional stimulus processing, the compelling group differences reported provide a necessary first step.

|               |                                                                                                                                       |
|---------------|---------------------------------------------------------------------------------------------------------------------------------------|
| Randomization | All participants were tested with the same experimental protocol. They were not assigned to different experimental groups.            |
| Blinding      | All experimenters were aware and not blinded with regards to the participant's condition (i.e. TR-PTSD, pharmaco-resistant epilepsy). |

## Reporting for specific materials, systems and methods

We require information from authors about some types of materials, experimental systems and methods used in many studies. Here, indicate whether each material, system or method listed is relevant to your study. If you are not sure if a list item applies to your research, read the appropriate section before selecting a response.

### Materials & experimental systems

| n/a                                 | Involvement in the study                               |
|-------------------------------------|--------------------------------------------------------|
| <input checked="" type="checkbox"/> | <input type="checkbox"/> Antibodies                    |
| <input checked="" type="checkbox"/> | <input type="checkbox"/> Eukaryotic cell lines         |
| <input checked="" type="checkbox"/> | <input type="checkbox"/> Palaeontology and archaeology |
| <input checked="" type="checkbox"/> | <input type="checkbox"/> Animals and other organisms   |
| <input type="checkbox"/>            | <input checked="" type="checkbox"/> Clinical data      |
| <input checked="" type="checkbox"/> | <input type="checkbox"/> Dual use research of concern  |

### Methods

| n/a                                 | Involvement in the study                                   |
|-------------------------------------|------------------------------------------------------------|
| <input checked="" type="checkbox"/> | <input type="checkbox"/> ChIP-seq                          |
| <input checked="" type="checkbox"/> | <input type="checkbox"/> Flow cytometry                    |
| <input type="checkbox"/>            | <input checked="" type="checkbox"/> MRI-based neuroimaging |

## Clinical data

Policy information about [clinical studies](#)

All manuscripts should comply with the ICMJE [guidelines for publication of clinical research](#) and a completed [CONSORT checklist](#) must be included with all submissions.

|                             |                                                                                                                                                                                                                                                                                                                                                                                                                                                                                                                                                                                                                                                                                                                                                                                                                            |
|-----------------------------|----------------------------------------------------------------------------------------------------------------------------------------------------------------------------------------------------------------------------------------------------------------------------------------------------------------------------------------------------------------------------------------------------------------------------------------------------------------------------------------------------------------------------------------------------------------------------------------------------------------------------------------------------------------------------------------------------------------------------------------------------------------------------------------------------------------------------|
| Clinical trial registration | ClinicalTrials.gov NCT04152993                                                                                                                                                                                                                                                                                                                                                                                                                                                                                                                                                                                                                                                                                                                                                                                             |
| Study protocol              | A full study protocol is attached with supporting documentation for the manuscript and can also be found at ClinicalTrials.gov NCT04152993                                                                                                                                                                                                                                                                                                                                                                                                                                                                                                                                                                                                                                                                                 |
| Data collection             | PTSD symptom severity was tracked in both TR-PTSD participants using the Clinician-Administered PTSD Scale for DMS-5 (CAPS-5)13. Assessment interviews were administered and rated by the study psychiatrist (R.J.K.) and clinical psychologist (J.S.) using the CAPS-5 which reflects disease status during the preceding month. CAPS-5 scores were collected 5-6 months and 1 month before surgery, 1 month after surgery (before stimulation initiation) and 2, 3, and 4 months post stimulation for a total of 6 measures in each TR-PTSD participant. Clinical data was collected via video chat (due to COVID precautions) and in person at the medical facility of the treating physician. Both TR-PTSD participants were recruited in the same year and began the study protocol one month apart from one another. |
| Outcomes                    | Prior to participant enrollment, the primary outcome of the clinical trial was defined as 12 months of Clinician Administered PTSD Scale (CAPS) monitoring. To assess the magnitude of individual PTSD symptom change due to stimulation, we computed difference scores of mean CAPS-5 scores across assessments before and after stimulation onset for each participant. Symptom changes were classified as indicative of reliable change when the difference scores were greater than the threshold for identifying clinically meaningful change for male combat veterans reported by Marx et al (Reference 14).                                                                                                                                                                                                         |

## Magnetic resonance imaging

### Experimental design

|                                 |                                                                                                                                           |
|---------------------------------|-------------------------------------------------------------------------------------------------------------------------------------------|
| Design type                     | MRI was used only to determine the localization of electrode contacts within the brain.                                                   |
| Design specifications           | MRI was used only for electrode contact localization; thus, participants did not perform an experimental task during MRI scanning.        |
| Behavioral performance measures | No behavioral performance measures were acquired or derived, since participants did not perform an experimental task during MRI scanning. |

### Acquisition

|                               |                                                                            |
|-------------------------------|----------------------------------------------------------------------------|
| Imaging type(s)               | Structural                                                                 |
| Field strength                | 3 Tesla                                                                    |
| Sequence & imaging parameters | Standard T1- and T2-weighted sequences                                     |
| Area of acquisition           | Whole-Brain                                                                |
| Diffusion MRI                 | <input type="checkbox"/> Used <input checked="" type="checkbox"/> Not used |

## Preprocessing

|                            |                                                                                                                                                                                                                                                                  |
|----------------------------|------------------------------------------------------------------------------------------------------------------------------------------------------------------------------------------------------------------------------------------------------------------|
| Preprocessing software     | MRI data were preprocessed using FSL (FMRIB Software Library, Oxford University, UK; v5.0.11) for image registration with the FLIRT function (default parameters), and ITK-SNAP (version 3.8.0) for visualization and manual segmentation of electrode contacts. |
| Normalization              | All MRI images were registered to standardized space.                                                                                                                                                                                                            |
| Normalization template     | MNI152_T1_2mm_brain.nii                                                                                                                                                                                                                                          |
| Noise and artifact removal | No noise or artifact removal procedures were applied.                                                                                                                                                                                                            |
| Volume censoring           | Volume censoring was not applied.                                                                                                                                                                                                                                |

## Statistical modeling & inference

|                                                                           |                                                                                                                                  |
|---------------------------------------------------------------------------|----------------------------------------------------------------------------------------------------------------------------------|
| Model type and settings                                                   | No model-based analyses were performed using MRI data.                                                                           |
| Effect(s) tested                                                          | MRI was used only for electrode contact localization; thus, no task- or stimulus-related analyses were performed using MRI data. |
| Specify type of analysis:                                                 | <input checked="" type="checkbox"/> Whole brain <input type="checkbox"/> ROI-based <input type="checkbox"/> Both                 |
| Statistic type for inference<br>(See <a href="#">Eklund et al. 2016</a> ) | No statistical analyses were performed using MRI data.                                                                           |
| Correction                                                                | No statistical analyses were performed using MRI data; thus, no correction methods were applied.                                 |

## Models & analysis

|                                     |                                                                       |
|-------------------------------------|-----------------------------------------------------------------------|
| n/a                                 | Involvement in the study                                              |
| <input checked="" type="checkbox"/> | <input type="checkbox"/> Functional and/or effective connectivity     |
| <input checked="" type="checkbox"/> | <input type="checkbox"/> Graph analysis                               |
| <input checked="" type="checkbox"/> | <input type="checkbox"/> Multivariate modeling or predictive analysis |
